# Supplementary material for: Influence of Hydrothermal Treatment on Physicochemical Properties and Drug Release of Anti-Inflammatory Drugs of Intercalated Layered Double Hydroxide Nanoparticles
Source: MDPI journal article supplement (doi:10.3390/pharmaceutics6020235), 2014-05-22
Supplement: s1 [file s1]

## Supplementary Information

**Figure S1.** Powder XRD patterns for LDH-NAP-HT before and after release. The patterns before and after release were recorded on a Rigaku Miniflex using Co  $K\alpha$  source ( $\lambda = 0.178897$  nm) and a Bruker Advance D8 X-ray Diffractometer using Cu  $K\alpha$  source ( $\lambda = 0.15418$  nm) at a scanning rate of  $0.02^\circ/\text{s}$  ( $2\theta$ ) from  $2\theta = 2^\circ$  to  $2\theta = 80^\circ$ . The data from Cu  $K\alpha$  source has been converted to Co  $K\alpha$  source, and shown in the figure. The new peaks appear on the pattern of LDH-NAP-HT after release, which were around  $2\theta = 10.3^\circ$ ,  $19.5^\circ$  and  $28.4^\circ$  and labeled as (003), (006), and (009). The corresponding interlayer spacing is calculated to be 1.05 nm, in agreement with 1.06 nm of  $\text{HPO}_4$ -intercalated LDH reported previously.

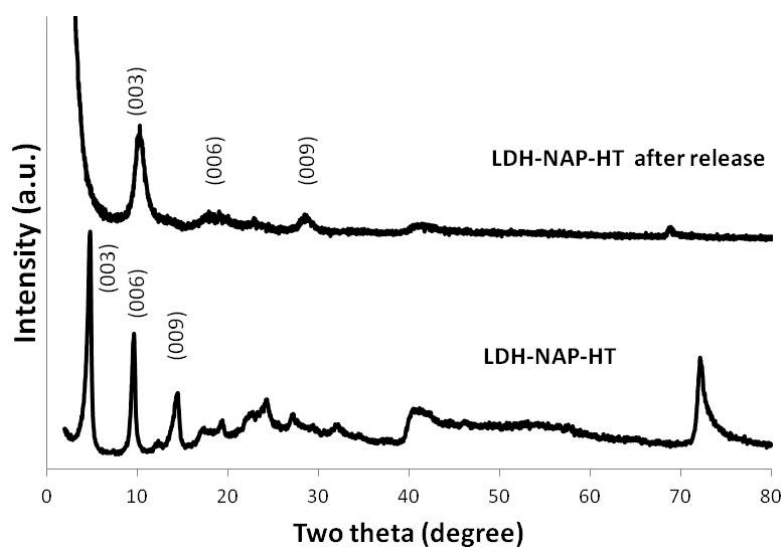

© 2014 by the authors; licensee MDPI, Basel, Switzerland. This article is an open access article distributed under the terms and conditions of the Creative Commons Attribution license (<http://creativecommons.org/licenses/by/3.0/>).
